# Supplementary material for: RNA polymerase backtracking results in the accumulation of fission yeast condensin at active genes
Source: Life Sci Alliance. 2021 Mar 26;4(6):e202101046. doi: 10.26508/lsa.202101046 (PMC8046420; doi:10.26508/lsa.202101046)
Supplement: Supplementary file 1 [file LSA-2021-01046_SdataF1.xlsx]

## Sheet: Fig 1
Raw data for Fig 1
	Cnd2
				exg1#8	P2qL1	exg1#2	exg1P6qL1	exg1#4	exg1#1	exg1#5	exg1#6	exg1#7
		position		122	420	823	1279	1705	2260	2677	3211	3972
	no tag		no tag_#1	0.000826685	0.00189179	0.000550817	0.00271328	0.00335624	0.00283246	0.00318305	0.00214806	0.00186692
			no tag_#2	0.000855394	0.00183179	0.000669344	0.00271157	0.00330396	0.00271276	0.00297453	0.00192308	0.0019234
	cnd2-GFP exg1+		cnd2-GFP_#1	0.00107363	0.00145172	0.00582907	0.00163388	0.00600431	0.0108483	0.0135734	0.0461487	0.00624524
			cnd2-GFP_#2	0.00190123	0.00261967	0.00637255	0.00251655	0.00789838	0.0148132	0.0190623	0.0640675	0.0114045
				exg1#8	P2qL1	exg1#6	exg1#5	exg1#1	exg1#4	exg1P6qL1	exg1#2	exg1#7
		position		122	420	641	1175	1592	2149	2574	3031	3972
	cnd2-GFP Inv_Exg1		cnd2-GFP_#1	0.00620061	0.0265722	0.0451685	0.0115768	0.00880178	0.00492108	0.000800574	0.00492251	0.00234968
			cnd2-GFP_#2	0.0089374	0.0281073	0.0515343	0.0141201	0.0105374	0.005919	0.00127233	0.00539637	0.00380698
												0
	Rpb1
				exg1#8	P2qL1	exg1#2	exg1P6qL1	exg1#4	exg1#1	exg1#5	exg1#6	exg1#7
		position		122	420	823	1279	1705	2260	2677	3211	3972
	no tag		no tag_#1	0.00243109	0.0050227	0.0025764	0.0157407	0.022648	0.0235564	0.0242642	0.0241273	0.0041093
			no tag_#2	0.00346257	0.00738734	0.00380187	0.0182067	0.0280551	0.025939	0.0252796	0.0241235	0.0062786
	cnd2-GFP exg1+		cnd2-GFP_#1	0.00333609	0.00277965	0.00964408	0.0356537	0.0934707	0.108973	0.0957235	0.105943	0.00331302
			cnd2-GFP_#2	0.00553436	0.0043342	0.0110218	0.0442368	0.126008	0.136525	0.129877	0.117798	0.00744807
				exg1#8	P2qL1	exg1#6	exg1#5	exg1#1	exg1#4	exg1P6qL1	exg1#2	exg1#7
		position		122	420	641	1175	1592	2149	2574	3031	3972
	cnd2-GFP Inv_Exg1		cnd2-GFP_#1	0.00434617	0.0370715	0.155655	0.151577	0.165533	0.131445	0.0285551	0.0103907	0.0113106
			cnd2-GFP_#2	0.00542113	0.0388653	0.136312	0.155462	0.156675	0.135514	0.0287542	0.0100573	0.01589
