# Supplementary material for: RNA polymerase backtracking results in the accumulation of fission yeast condensin at active genes
Source: Life Sci Alliance. 2021 Mar 26;4(6):e202101046. doi: 10.26508/lsa.202101046 (PMC8046420; doi:10.26508/lsa.202101046)
Supplement: Supplementary file 5 [file LSA-2021-01046_TableS1.xlsx]

## Sheet: Sheet1
Supplementary_Table_S1: strains used in this study
LY112	h+	leu1-32 ura4D18 ade6-210
LY4232	h-		KanR-Pnmt41-slp1+
LY4233	h-		KanR-Pnmt41-slp1+ sen1∆::HygroR
LY4234	h-		KanR-Pnmt41-slp1+ cnd2-GFP-LEU2
LY4237	h+		KanR-Pnmt41-slp1+ sen1∆::HygroR cnd2-GFP-LEU2
LY4339	h-	leu1-32	KanR-Pnmt41-slp1+ cut3-GFP-ura4+
LY4340	h+	leu1-32	KanR-Pnmt41-slp1+
LY4483	h-	leu1-32 ura4D	KanR-Pnmt41-slp1+ cnd2-GFP-LEU2
LY4488	h?		KanR-Pnmt41-slp1+ sen1∆::HygroR cnd2-GFP-LEU2
LY4681	h+	leu1-32 ura4D18	cdc2asM17
LY4682	h-	leu1-32 ura4D18	cdc2asM17
LY4731	h-	leu1-32 ura4D	cdc2asM17 cnd2-GFP-LEU2
LY4732	h+	leu1-32 ura4D	cdc2asM17 cnd2-GFP-LEU2
LY4781	h-		cdc2asM17 sen1∆::KanR
LY4979	h+	leu1-32 ade6-704	cdc2asM17 cnd2-GFP-LEU2 rpc37-3flag-NatR
LY4980	h-	leu1-32 ade6-704	cdc2asM17 cnd2-GFP-LEU2 rpc37-3flag-NatR
LY4981	h+	leu1-32 ade6-704	cdc2asM17 cnd2-GFP-LEU2 rpc37-3flag-NatR sen1∆::KanR
LY4982	h-	leu1-32 ade6-704	cdc2asM17 cnd2-GFP-LEU2 rpc37-3flag-NatR sen1∆::KanR
LY5034	h?	leu1-32 ura4- ade6-	his7::LacI-GFP ura4-Pnmt41-slp1+
LY5035	h-	leu1-32 ura4- ade6-	his7::LacI-GFP ura4-Pnmt41-slp1+ sen1∆::KanR
LY5036	h?	leu1-32 ura4- ade6-	his7::LacI-GFP ura4-Pnmt41-slp1+ nda3-KM311
LY5038	h?	leu1-32 ura4- ade6-	his7::LacI-GFP ura4-Pnmt41-slp1+ nda3-KM311 sen1∆::KanR
LY5609	h-	leu1-32	KanR-Pnmt41-slp1+
LY5610	h-	leu1-32	KanR-Pnmt41-slp1+ sen1D::HygroR
LY5615	h+	leu1-32	KanR-Pnmt41-slp1+ sfc6-13myc-KanR
LY5616	h+	leu1-32	KanR-Pnmt41-slp1+ sfc6-13myc-KanR
LY5617	h+	leu1-32	KanR-Pnmt41-slp1+ sfc6-13myc-KanR sen1∆::HygroR
LY5618	h+	leu1-32	KanR-Pnmt41-slp1+ sfc6-13myc-KanR sen1∆::HygroR
LY5764	h+	leu1-32 ura4D ade6-210/704?	cdc2-asM17 arg10-23T sen1∆::KanR cnd2-GFP-LEU2 rpc37-3flag-NatR
LY5765	h-	leu1-32 ura4D ade6-210/704?	cdc2-asM17 arg10-23T sen1∆::KanR cnd2-GFP-LEU2 rpc37-3flag-NatR
LY6201	h-	leu1-32 ura4D ade6-210/704	cdc2-asM17 thr10-20T sen1∆::KanR cnd2-GFP-LEU2 rpc37-3flag-NatR
LY6203	h+	leu1-32 ura4D ade6-210/704	cdc2-asM17 thr10-20T sen1∆::KanR cnd2-GFP-LEU2 rpc37-3flag-NatR
LY6215	h-	leu1-32 ura4D ade6-210/704	cdc2-asM17 thr10-20T cnd2-GFP-LEU2 rpc37-3flag-NatR
LY6585	h+	leu1-32 ura4D ade6-210	cdc2-asM17 inverted-exg1 cnd2-GFP-LEU2
LY6586	h-	leu1-32 ura4D ade6-210	cdc2-asM17 inverted-exg1 cnd2-GFP-LEU2
